# Supplementary material
Source: MDPI journal article supplement (https://www.mdpi.com/2079-6412/12/1/63)
Supplement: s1 [file s1 › coatings-1494675-supplementary.pdf]

# Supplementary Materials: Dual Synergistic Effects of MgO-GO Fillers on Degradation Behavior, Biocompatibility and Antibacterial Activities of Chitosan Coated Mg Alloy

Mohammad Zolfaghari Baghbaderani <sup>1</sup>, Somayeh Abazari <sup>2,3</sup>, Hamid Reza Bakhsheshi-Rad <sup>1,\*</sup>, Ahmad Fauzi Ismail <sup>4</sup>, Safian Sharif <sup>5</sup>, Aliakbar Najafinezhad <sup>1</sup>, Seeram Ramakrishna <sup>6</sup>, Mohammadreza Daroonparvar <sup>7,\*</sup> and Filippo Berto <sup>8,\*</sup>

- <sup>1</sup> Advanced Materials Research Center, Department of Materials Engineering, Najafabad Branch, Islamic Azad University, Najafabad, Iran; Mohammadzolfaghari.bi@gmail.com (M.Z.B.); aliakbar.najafinezhad@gmail.com (A.N.)
  - <sup>2</sup> Department of Materials and Metallurgical Engineering, Amirkabir University of Technology, Tehran, Iran; somayeh.abazari@gmail.com
  - <sup>3</sup> Iranian National Standards Organization, Iran
  - <sup>4</sup> Advanced Membrane Technology Research Center (AMTEC), University Teknologi Malaysia, Johor Bahru, Johor 81310, Malaysia; afauzi@utm.my
  - <sup>5</sup> Faculty of Engineering, University Teknologi Malaysia, Johor Bahru, Johor 81310, Malaysia; safian@utm.my
  - <sup>6</sup> Department of Mechanical Engineering, National University of Singapore, 9 Engineering Drive 1, Singapore 117576, Singapore; seeram@nus.edu.sg
  - <sup>7</sup> Department of Chemical and Materials Engineering, University of Nevada, Reno, NV 89501, USA
  - <sup>8</sup> Department of Mechanical and Industrial Engineering, Norwegian University of Science and Technology, 7491 Trondheim, Norway
- \* Correspondence: rezabakhsheshi@pmt.iaun.ac.ir (H.R.B.-R.); mr.daroonparvar@yahoo.com (M.D.); filippo.berto@ntnu.no (F.B.)

**Citation:** Baghbaderani, M.Z.; Abazari, S.; Bakhsheshi-Rad, H.R.; Ismail, A.F.; Sharif, S.; Najafinezhad, A.; Ramakrishna, S.; Daroonparvar, M.; Berto, F. Dual Synergistic Effects of MgO-GO Fillers on Degradation Behavior, Biocompatibility and Antibacterial Activities of Chitosan Coated Mg Alloy. *Coatings* **2022**, *12*, 63. <https://doi.org/10.3390/coatings12010063>

Academic Editor: Jian Chen

Received: 19 November 2021

Accepted: 21 December 2021

Published: 6 February 2022

**Publisher's Note:** MDPI stays neutral with regard to jurisdictional claims in published maps and institutional affiliations.

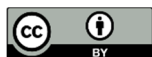

**Copyright:** © 2022 by the authors. Submitted for possible open access publication under the terms and conditions of the Creative Commons Attribution (CC BY) license (<https://creativecommons.org/licenses/by/4.0/>).

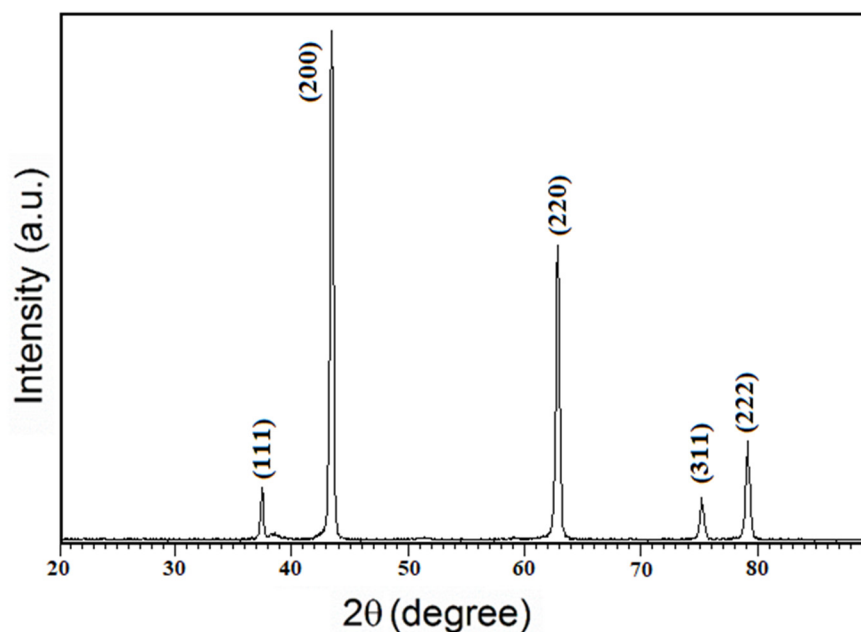

**Figure S1.** XRD patterns of MgO powders.

**Table S1.** Chemical composition of the Kokubo simulated body fluid (SBF).

| Solution       | Ion Concentration (mmol/L) |                |                  |                  |                               |                 |                                |                               |
|----------------|----------------------------|----------------|------------------|------------------|-------------------------------|-----------------|--------------------------------|-------------------------------|
|                | Na <sup>+</sup>            | K <sup>+</sup> | Ca <sup>2+</sup> | Mg <sup>2+</sup> | HCO <sub>3</sub> <sup>-</sup> | Cl <sup>-</sup> | HPO <sub>4</sub> <sup>2-</sup> | SO <sub>4</sub> <sup>2-</sup> |
| Kokubo (c-SBF) | 142.0                      | 5.0            | 2.5              | 1.5              | 4.2                           | 147.8           | 1.0                            | 0.5                           |
